# Supplementary material for: Electric Field-Driven Water Dipoles: Nanoscale Architecture of Electroporation
Source: PLoS One. 2013 Apr 11;8(4):e61111. doi: 10.1371/journal.pone.0061111 (PMC3623848; doi:10.1371/journal.pone.0061111)
Supplement: Table S1 — List of the performed simulations and the associated parameters. (XLSX) [file pone.0061111.s001.xlsx]

## Sheet: Sheet1
TABLE 1S: List of the performed simulations and the associated parameters.
SIMULATIONS USED TO DETERMINE PORE INITIATION TIME
Simulation Type	System Size	Force Fields	Water Model	Electric Field [MV/m]	# of trials	Ensemble	Temperature [K]	T coupling	Compressibility	Bond lengths constraints algorithm	Short-range Electrostatic cutoff [nm]	Long-range Lennard-Jones cutoff [nm]	Long-range Electrostatic Model	FFT, Fouier spacing	Interpolation Order	Pressure Bath
WLW	128 POPC, 4480 Waters	OPLS united-atom parameters obtained from Tieleman's group http://moose.bio.ucalgary.ca	SPC/E	400	3	NPT	310	v-rescale	4.5e-05	LINCS	1.4	1.4	PME	0.12	4	1 bar
WLW	128 POPC, 4480 Waters	OPLS united-atom parameters obtained from Tieleman's group http://moose.bio.ucalgary.ca	SPC/E	450	3	NPT	310	v-rescale	4.5e-05	LINCS	1.4	1.4	PME	0.12	4	1 bar
WLW	128 POPC, 4480 Waters	OPLS united-atom parameters obtained from Tieleman's group http://moose.bio.ucalgary.ca	SPC/E	500	3	NPT	310	v-rescale	4.5e-05	LINCS	1.4	1.4	PME	0.12	4	1 bar
WLW	128 POPC, 4480 Waters	OPLS united-atom parameters obtained from Tieleman's group http://moose.bio.ucalgary.ca	SPC/E	550	3	NPT	310	v-rescale	4.5e-05	LINCS	1.4	1.4	PME	0.12	4	1 bar
WLW	128 POPC, 4480 Waters	OPLS united-atom parameters obtained from Tieleman's group http://moose.bio.ucalgary.ca	SPC/E	600	3	NPT	310	v-rescale	4.5e-05	LINCS	1.4	1.4	PME	0.12	4	1 bar
WLW	128 POPC, 4480 Waters	OPLS united-atom parameters obtained from Tieleman's group http://moose.bio.ucalgary.ca	SPC/E	650	3	NPT	310	v-rescale	4.5e-05	LINCS	1.4	1.4	PME	0.12	4	1 bar
WLW	128 POPC, 4480 Waters	OPLS united-atom parameters obtained from Tieleman's group http://moose.bio.ucalgary.ca	SPC/E	700	3	NPT	310	v-rescale	4.5e-05	LINCS	1.4	1.4	PME	0.12	4	1 bar
Simulation Type	Computational Domain Dimensions	Vaccum Gap Size	Water Model	Electric Field [MV/m]	# of trials	Ensemble	Temp [K]	T coupling		Bond Lengths Constraints Algorithm	Short-range Electrostatic cutoff [nm]	Long-range Lennard-Jones cutoff [nm]	Long-range Electrostatic Model	FFT, Fouier Spacing	Interpolation Order
WVW	7 nm by 7 nm by 7 nm, 6877 Waters	2.8 nm	SPC/E	500	3	NVT	310	v-rescale		LINCS	1.4	1	PME	0.12	4
WVW	7 nm by 7 nm by 7 nm, 6877 Waters	2.8 nm	SPC/E	600	3	NVT	310	v-rescale		LINCS	1.4	1	PME	0.12	4
WVW	7 nm by 7 nm by 7 nm, 6877 Waters	2.8 nm	SPC/E	700	3	NVT	310	v-rescale		LINCS	1.4	1	PME	0.12	4
WVW	7 nm by 7 nm by 7 nm, 6877 Waters	2.8 nm	SPC/E	800	3	NVT	310	v-rescale		LINCS	1.4	1	PME	0.12	4
SIMULATIONS USED TO ANALYZE ENERGETICS OF THE SYSTEMS
Simulation Type	System Size	Force Fields	Water Model	Electric Field [MV/m]	# of trials	Ensemble	Temperature [K]	T coupling	Compressibility	Bond lengths constraints algorithm	Short-range Electrostatic cutoff [nm]	Long-range Lennard-Jones cutoff [nm]	Long-range Electrostatic Model	FFT, Fouier spacing	Interpolation Order	Pressure Bath
WLW	128 POPC, 4480 Waters	OPLS united-atom parameters obtained from Peter Tieleman	SPC/E	500*	10	NPT	310	v-rescale	4.5e-05	LINCS	1.4	1.4	PME	0.12	4	1 bar
WLW	128 POPC, 4480 Waters	OPLS united-atom parameters obtained from Peter Tieleman	SPC/E	600	30	NPT	310	v-rescale	4.5e-05	LINCS	1.4	1.4	PME	0.12	4	1 bar
WLW	128 POPC, 4480 Waters	OPLS united-atom parameters obtained from Peter Tieleman	SPC/E	700	10	NPT	310	v-rescale	4.5e-05	LINCS	1.4	1.4	PME	0.12	4	1 bar
Simulation Type	Computational Domain Dimensions	Vaccum Gap Size	Water Model	Electric Field [MV/m]	# of trials	Ensemble	Temp [K]	T coupling		Bond Lengths Constraints Algorithm	Short-range Electrostatic cutoff [nm]	Long-range Lennard-Jones cutoff [nm]	Long-range Electrostatic Model	FFT, Fouier Spacing	Interpolation Order
WVW	7 nm by 7 nm by 7 nm, 6877 Waters	2.8 nm	SPC/E	500*	10	NVT	310	v-rescale		LINCS	1.4	1.4	PME	0.12	4
WVW	7 nm by 7 nm by 7 nm, 6877 Waters	2.8 nm	SPC/E	600	30	NVT	310	v-rescale		LINCS	1.4	1.4	PME	0.12	4
WVW	7 nm by 7 nm by 7 nm, 6877 Waters	2.8 nm	SPC/E	700	10	NVT	310	v-rescale		LINCS	1.4	1.4	PME	0.12	4
SIMULATIONS USED TO STUDY THE EFFECTS OF VACUUM GAP SIZE IN WVW SYSTEMS
Simulation Type	Computational Domain Dimensions	Vaccum Gap Size	Water Model	Electric Field [MV/m]	# of trials	Ensemble	Temp [K]	T coupling	Bond Lengths Constraints Algorithm	Short-range Electrostatic cutoff [nm]	Long-range Lennard-Jones cutoff [nm]	Long-range Electrostatic Model	FFT, Fouier Spacing	Interpolation Order
WVW	7 nm by 7 nm by 7 nm, 7231 Waters	2.6 nm	SPC/E	300	3	NVT	310	v-rescale	LINCS	1	1	PME	0.12	4
WVW	7 nm by 7 nm by 7 nm, 7231 Waters	2.6 nm	SPC/E	400	3	NVT	310	v-rescale	LINCS	1	1	PME	0.12	4
WVW	7 nm by 7 nm by 7 nm, 7231 Waters	2.6 nm	SPC/E	500	3	NVT	310	v-rescale	LINCS	1	1	PME	0.12	4
WVW	7 nm by 7 nm by 7 nm, 7231 Waters	2.6 nm	SPC/E	600	3	NVT	310	v-rescale	LINCS	1	1	PME	0.12	4
WVW	7 nm by 7 nm by 7 nm, 7231 Waters	2.6 nm	SPC/E	700	3	NVT	310	v-rescale	LINCS	1	1	PME	0.12	4
WVW	7 nm by 7 nm by 7 nm, 7231 Waters	2.6 nm	SPC/E	800	3	NVT	310	v-rescale	LINCS	1	1	PME	0.12	4
WVW	7 nm by 7 nm by 7 nm, 6877 Waters	2.8 nm	SPC/E	300	3	NVT	310	v-rescale	LINCS	1	1	PME	0.12	4
WVW	7 nm by 7 nm by 7 nm, 6877 Waters	2.8 nm	SPC/E	400	3	NVT	310	v-rescale	LINCS	1	1	PME	0.12	4
WVW	7 nm by 7 nm by 7 nm, 6877 Waters	2.8 nm	SPC/E	450	3	NVT	310	v-rescale	LINCS	1	1	PME	0.12	4
WVW	7 nm by 7 nm by 7 nm, 6877 Waters	2.8 nm	SPC/E	500	3	NVT	310	v-rescale	LINCS	1	1	PME	0.12	4
WVW	7 nm by 7 nm by 7 nm, 6877 Waters	2.8 nm	SPC/E	600	3	NVT	310	v-rescale	LINCS	1	1	PME	0.12	4
WVW	7 nm by 7 nm by 7 nm, 6877 Waters	2.8 nm	SPC/E	700	3	NVT	310	v-rescale	LINCS	1	1	PME	0.12	4
WVW	7 nm by 7 nm by 7 nm, 6877 Waters	2.8 nm	SPC/E	800	3	NVT	310	v-rescale	LINCS	1	1	PME	0.12	4
WVW	7 nm by 7 nm by 7 nm, 6554 Waters	3 nm	SPC/E	600	3	NVT	310	v-rescale	LINCS	1	1	PME	0.12	4
WVW	7 nm by 7 nm by 7 nm, 6554 Waters	3 nm	SPC/E	700	3	NVT	310	v-rescale	LINCS	1	1	PME	0.12	4
WVW	7 nm by 7 nm by 7 nm, 6554 Waters	3 nm	SPC/E	800	3	NVT	310	v-rescale	LINCS	1	1	PME	0.12	4
WVW	7 nm by 7 nm by 7 nm, 6554 Waters	3 nm	SPC/E	900	3	NVT	310	v-rescale	LINCS	1	1	PME	0.12	4
WVW	7 nm by 7 nm by 7 nm, 5727 Waters	3.5 nm	SPC/E	650	3	NVT	310	v-rescale	LINCS	1	1	PME	0.12	4
WVW	7 nm by 7 nm by 7 nm, 5727 Waters	3.5 nm	SPC/E	700	3	NVT	310	v-rescale	LINCS	1	1	PME	0.12	4
WVW	7 nm by 7 nm by 7 nm, 5727 Waters	3.5 nm	SPC/E	800	3	NVT	310	v-rescale	LINCS	1	1	PME	0.12	4
WVW	7 nm by 7 nm by 7 nm, 5727 Waters	3.5 nm	SPC/E	900	3	NVT	310	v-rescale	LINCS	1	1	PME	0.12	4
WVW	7 nm by 7 nm by 7 nm, 4899 Waters	4 nm	SPC/E	800	3	NVT	310	v-rescale	LINCS	1	1	PME	0.12	4
WVW	7 nm by 7 nm by 7 nm, 4899 Waters	4 nm	SPC/E	850	3	NVT	310	v-rescale	LINCS	1	1	PME	0.12	4
WVW	7 nm by 7 nm by 7 nm, 4899 Waters	4 nm	SPC/E	900	3	NVT	310	v-rescale	LINCS	1	1	PME	0.12	4
WVW	7 nm by 7 nm by 7 nm, 4899 Waters	4 nm	SPC/E	1000	3	NVT	310	v-rescale	LINCS	1	1	PME	0.12	4
SIMULATIONS USED TO STUDY THE EFFECTS OF SHORT-RANGE ELECTROSTATIC CUTOFFS
Simulation Type	Computational Domain Dimensions	Vaccum Gap Size	Water Model	Electric Field [MV/m]	# of trials	Ensemble	Temp [K]	T coupling	Bond Lengths Constraints Algorithm	Short-range Electrostatic cutoff [nm]	Long-range Lennard-Jones cutoff [nm]	Long-range Electrostatic Model	FFT, Fouier Spacing	Interpolation Order
WVW	7 nm by 7 nm by 7 nm, 6877 Waters	2.8 nm	SPC/E	600	3	NVT	310	v-rescale	LINCS	1	1	PME	0.12	4
WVW	7 nm by 7 nm by 7 nm, 6877 Waters	2.8 nm	SPC/E	600	3	NVT	310	v-rescale	LINCS	1.2	1.2	PME	0.12	4
WVW	7 nm by 7 nm by 7 nm, 6877 Waters	2.8 nm	SPC/E	600	3	NVT	310	v-rescale	LINCS	1.4	1.4	PME	0.12	4
WVW	7 nm by 7 nm by 7 nm, 6877 Waters	2.8 nm	SPC/E	600	3	NVT	310	v-rescale	LINCS	1.6	1.6	PME	0.12	4
WVW	7 nm by 7 nm by 7 nm, 6877 Waters	2.8 nm	SPC/E	600	3	NVT	310	v-rescale	LINCS	1.8	1.8	PME	0.12	4
SIMULATIONS USED TO STUDY THE EFFECTS OF DIFFERENT WATER MODELS
Simulation Type	Computational Domain Dimensions	Vaccum Gap Size	Water Model	Electric Field [MV/m]	# of trials	Ensemble	Temp [K]	T coupling	Bond Lengths Constraints Algorithm	Short-range Electrostatic cutoff [nm]	Long-range Lennard-Jones cutoff [nm]	Long-range Electrostatic Model	FFT, Fouier Spacing	Interpolation Order
WVW	10 nm by 10 nm by 7 nm, 19870 Waters	4 nm	SPC/E	0	10	NVT	300	v-rescale	LINCS	1.2	1.2	PME	0.12	4
WVW	10 nm by 10 nm by 7 nm, 19870 Waters	4 nm	SPC/E	600	10	NVT	300	v-rescale	LINCS	1.2	1.2	PME	0.12	4
WVW	10 nm by 10 nm by 7 nm, 19870 Waters	4 nm	SPC/E	700	10	NVT	300	v-rescale	LINCS	1.2	1.2	PME	0.12	4
WVW	10 nm by 10 nm by 7 nm, 19870 Waters	4 nm	SPC/E	800	10	NVT	300	v-rescale	LINCS	1.2	1.2	PME	0.12	4
WVW	10 nm by 10 nm by 7 nm, 19870 Waters	4 nm	SPC/E	900	10	NVT	300	v-rescale	LINCS	1.2	1.2	PME	0.12	4
WVW	10 nm by 10 nm by 7 nm, 19870 Waters	4 nm	SPC/E	1000	10	NVT	300	v-rescale	LINCS	1.2	1.2	PME	0.12	4
WVW	10 nm by 10 nm by 7 nm, 19870 Waters	4 nm	SPC/E flexible	0	10	NVT	300	v-rescale	LINCS	1.2	1.2	PME	0.12	4
WVW	10 nm by 10 nm by 7 nm, 19870 Waters	4 nm	SPC/E flexible	600	10	NVT	300	v-rescale	LINCS	1.2	1.2	PME	0.12	4
WVW	10 nm by 10 nm by 7 nm, 19870 Waters	4 nm	SPC/E flexible	700	10	NVT	300	v-rescale	LINCS	1.2	1.2	PME	0.12	4
WVW	10 nm by 10 nm by 7 nm, 19870 Waters	4 nm	SPC/E flexible	800	10	NVT	300	v-rescale	LINCS	1.2	1.2	PME	0.12	4
WVW	10 nm by 10 nm by 7 nm, 19870 Waters	4 nm	SPC/E flexible	900	10	NVT	300	v-rescale	LINCS	1.2	1.2	PME	0.12	4
WVW	10 nm by 10 nm by 7 nm, 19870 Waters	4 nm	SPC/E flexible	1000	10	NVT	300	v-rescale	LINCS	1.2	1.2	PME	0.12	4
